The association of typical and atypical symptoms on in-hospital mortality of older adults with COVID-19: a multicentre cohort study

# The association of typical and atypical symptoms on in-hospital mortality of older adults with COVID-19: a multicentre cohort study

Eric Kai-Chung Wong<sup>1,2,3</sup>, Jennifer Watt<sup>1,2,3</sup>, Hanyan Zou<sup>4</sup>, Arthana Chandraraj<sup>1</sup>, Alissa Wenyue Zhang<sup>5</sup>, Jahnel Brookes<sup>6</sup>, Ashley Verduyn<sup>7</sup>, Anna Berall<sup>6</sup>, Richard Norman<sup>3,4</sup>, Katrina Piggott<sup>3,5</sup>, Terumi Izukawa<sup>3,6,8</sup>, Sharon E. Straus<sup>1,2,3</sup>, Barbara Liu<sup>3,5\*</sup>

<sup>1</sup> Li Ka Shing Knowledge Institute, St. Michael's Hospital, Unity Health Toronto, Toronto, Canada

<sup>2</sup> Division of Geriatric Medicine, Department of Medicine, St. Michael's Hospital, Unity Health Toronto, Toronto, Canada

<sup>3</sup> Division of Geriatric Medicine, Department of Medicine, University of Toronto, Toronto, Canada

<sup>4</sup> Division of Geriatric Medicine, Department of Medicine, Sinai Health and University Health Network, Toronto, Canada

<sup>5</sup> Division of Geriatric Medicine, Department of Medicine, Sunnybrook Health Sciences Centre, Toronto, Canada

<sup>6</sup> Kunin-Lunenfeld Centre for Applied Research & Evaluation, Rotman Research Institute, Baycrest Health Sciences Centre, Toronto, Canada

<sup>7</sup> Providence Healthcare and Houses of Providence, Unity Health Toronto, Toronto, Canada

<sup>8</sup> Division of Geriatric Medicine, Department of Medicine, Baycrest Health Sciences Centre, Toronto, Canada

\* Corresponding author

Barbara Liu

Professor, Department of Medicine, University of Toronto

Sunnybrook Health Sciences Centre

2075 Bayview Ave., Room H4 79

Toronto, ON M4N 3M5

Phone: 416-480-6766

Fax: 416-480-6068

Email: [barbara.liu@sunnybrook.ca](mailto:barbara.liu@sunnybrook.ca)

The association of typical and atypical symptoms on in-hospital mortality of older adults with COVID-19: a multicentre cohort study

## 2 **Abstract**

3 Atypical disease presentations are common in older adults with COVID-19. The objective of this  
4 study was to determine the prevalence of atypical and typical symptoms in older adults with  
5 COVID-19 through progressive pandemic waves and the association of these symptoms with in-  
6 hospital mortality. This retrospective cohort study included consecutive adults aged over 65  
7 years with confirmed COVID-19 infection who were admitted to seven hospitals in Toronto,  
8 Canada from March 1, 2020 to June 30, 2021. The median age for the 1786 patients was 78.0  
9 years and 847 (47.5%) were female. Atypical symptoms (as defined by geriatric syndromes)  
10 occurred in 1187 patients (66.5%), but rarely occurred in the absence of other symptoms (n=106,  
11 6.2%). The most common atypical symptoms were anorexia (n=598, 33.5%), weakness (n=519,  
12 23.9%), and delirium (n=449, 25.1%). Dyspnea (adjusted odds ratio [aOR] 2.05, 95% confidence  
13 interval [CI] 1.62–2.62), tachycardia (aOR 1.87, 95% CI 1.14–3.04), and delirium (aOR 1.52,  
14 95% CI 1.18–1.96) were independently associated with in-hospital mortality. In a cohort of older  
15 adults hospitalized with COVID-19 infection, atypical presentations frequently overlapped with  
16 typical symptoms. Further research should be directed at understanding the cause and clinical  
17 significance of atypical presentations in older adults.

18 **Keywords:** COVID-19, geriatrics, atypical presentations, delirium, geriatric syndromes.

19

The association of typical and atypical symptoms on in-hospital mortality of older adults with COVID-19: a multicentre cohort study

## 20 **Introduction**

21           COVID-19 infection is associated with increased morbidity and mortality in older adults  
22 (Guan *et al.*, 2020). Studies early in the pandemic revealed that older adults frequently did not  
23 have typical symptoms, such as cough, fever, or shortness of breath (Singhal *et al.*, 2021).  
24 Atypical symptoms in older adults include geriatric syndromes, such as delirium, anorexia, or  
25 falls (Singhal *et al.*, 2021). These presentations are non-specific to COVID-19 (Hofman *et al.*,  
26 2017) and can occur with other diagnoses; as such, clinicians needed to increase their level of  
27 suspicion of COVID-19 infection in older adults. Atypical presentations in COVID-19 have been  
28 variably associated with mortality (Gan *et al.*, 2020). However, the definition of atypical  
29 presentation differs by study and it is often mixed with non-geriatric syndromes, such as  
30 abdominal pain or headache (Gan *et al.*, 2020). A geriatric-focused approach to the classification  
31 of COVID-19 symptoms would help better illustrate the spectrum of presentations.

32           As recurrent waves of the pandemic occurred across the world, new variants of COVID-  
33 19 emerged. Later variants, particularly the beta (B.1.351), gamma (P.1), and delta (B.1617.2)  
34 variants, were more virulent (Fisman and Tuite, 2021) and presented with different symptoms  
35 (ZOE COVID Study, 2021). In Ontario, Canada, wave 1 was predominantly caused by wild-type  
36 SARS-CoV-2 virus, while wave 2 was predominantly alpha variant (B.1.1.7) and wave 3 had  
37 increasing beta and gamma variants (Health Ontario, 2021). It is unknown whether clinical  
38 presentation changed in older adults across these three waves.

39           Furthermore, despite systematic reviews of early studies of COVID-19 symptoms  
40 (Singhal *et al.*, 2021), there is a lack of data looking at the way individuals with different  
41 comorbidities, place of residence, and frailty present. In particular, older age has been cited as

The association of typical and atypical symptoms on in-hospital mortality of older adults with COVID-19: a multicentre cohort study

42 the primary factor associated with atypical presentations of COVID-19, but it is unclear whether  
43 comorbidities and frailty also play a role.

44 Using a multicentre study of consecutively admitted older adults with COVID-19, the  
45 objectives of this study were to determine (i) the prevalence of each symptom and symptom  
46 category in older adults with COVID-19, (ii) the association of each symptom with in-hospital  
47 mortality, (iii) the change in symptoms with progressive waves of the pandemic and (iv) whether  
48 clinical presentation differs by age, frailty, place of residence and comorbidity.

## 49 **Methods**

50 This retrospective cohort study was done across seven hospitals in Toronto, Canada from  
51 March 1, 2020 to June 30, 2021. Two sites had long-term care and rehabilitation beds  
52 (Providence Healthcare and Baycrest Health Sciences). The remaining hospitals were acute care  
53 institutions (St. Michael's Hospital, Mount Sinai Hospital, Sunnybrook Hospital, Toronto  
54 General Hospital, and Toronto Western Hospital). Each of these facilities cared for patients with  
55 COVID-19 infections. Research ethics approval was obtained through Clinical Trials Ontario  
56 (3186-OPIA-Apr/2020-38044). The protocol for this study was published on Open Science  
57 Framework (<https://osf.io/k4g7a/>).

## 58 **Inclusion criteria**

- 59 1. Patients with COVID-19 infection confirmed by viral polymerase chain reaction (PCR)  
60 swab available from hospital medical records. Patients received COVID-19 tests either by  
61 screening protocols or by clinical suspicion of disease.
- 62 2. Age  $\geq 65$  years at the time of COVID-19 detection.
- 63 3. Admitted to one of the acute care hospitals, rehabilitation facilities, or LTC homes listed  
64 above.

The association of typical and atypical symptoms on in-hospital mortality of older adults with COVID-19: a multicentre cohort study

## 65 **Exclusion criteria**

- 66 1. Re-admission to hospital after index admission for COVID-19. Only charts from the  
67 initial admission were included.

## 68 **Data collection**

69 Decision support services at each hospital network identified COVID-19 cases in patients  
70 age 65 years or older on a monthly basis. A trained chart assessor conducted the chart review of  
71 each identified case and completed the case report forms hosted on a secure REDCap server at  
72 the Applied Health Research Centre in St. Michael's Hospital.

73 Since reports in the literature used various definitions of typical and atypical symptoms  
74 (Davis *et al.*, 2020; Pritchard *et al.*, 2020), we created 3 categories of symptoms: (i) classic, (ii)  
75 typical, and (iii) atypical. Classic symptoms (sometimes referred to as “typical symptoms” in the  
76 literature) included fever, cough and shortness of breath. Our definition of typical symptoms  
77 included other symptoms (sometimes labelled as “atypical symptoms” in the literature) defined  
78 by the World Health Organization case definition of COVID-19 infection (e.g. rhinorrhea,  
79 diarrhea, nausea, and chills) (World Health Organization, 2020). We reserved the category of  
80 atypical symptoms for geriatric syndromes reported in the literature (Emmett, 1998; Hofman *et*  
81 *al.*, 2017), such as delirium, anorexia, and weakness. Symptoms were extracted from each  
82 patient's chart, along with clinical frailty scale (CFS) (Rockwood *et al.*, 2005), place of residence  
83 and significant past medical history. We used CFS classification from the original study  
84 (Rockwood *et al.*, 2005).

85 The waves of the pandemic were defined by dates provided by Toronto Public Health or  
86 on the date of the nadir of case counts between waves if a public health definition was not  
87 available. Wave 1 occurred from March 11, 2020 to July 31, 2020, using dates defined by

The association of typical and atypical symptoms on in-hospital mortality of older adults with COVID-19: a multicentre cohort study

88 Toronto Public Health (City of Toronto, 2021). Wave 2 spanned August 1, 2020 to February 20,  
89 2021, which was defined by the nadir of case counts. Wave 3 occurred from February 21, 2021  
90 until June 30, 2021, which was our predefined study end date.

91 The primary outcome was in-hospital mortality. Each chart was assessed for delirium on  
92 presentation from emergency room and admission notes using a validated chart review method  
93 (CHART-DEL) (Saczynski *et al.*, 2014). Each chart assessor completed a training module for  
94 determination of CFS and extraction of CFS was regularly reviewed with a physician  
95 investigator. A training exercise was done on five charts where one of the physician investigators  
96 (BL, JW, EW, KP, TI, and AV) extracted chart data in duplicate with the chart assessor. After,  
97 the chart assessor regularly reviewed abstraction questions with the investigators. Five of the  
98 physician investigators were geriatricians (BL, JW, EW, KP, and TI) and one was a family  
99 physician (AV).

## 100 **Data processing**

101 The dataset was reviewed for any missing variables. Missing key variables (e.g. CFS,  
102 delirium, death) were flagged and those charts were reviewed by a physician investigator. Error  
103 checking was done to identify variables outside of acceptable ranges. Summary variables were  
104 created for any atypical presentation, any typical presentation, any classic symptoms and any  
105 functional impairment. Missing CFS data was imputed as 6 (moderate frailty) for residents from  
106 LTC and 5 (mild frailty) for those from retirement homes or assisted living facilities based on  
107 local LTC admission criteria and published frailty estimates (Muscedere *et al.*, 2016). Missing  
108 frailty or functional status data from community dwelling patients were not imputed because of  
109 the diverse range of frailty levels in this cohort (Kelly *et al.*, 2017).

The association of typical and atypical symptoms on in-hospital mortality of older adults with COVID-19: a multicentre cohort study

## 110 **Analysis**

111 Patient baseline characteristics were analysed descriptively with proportions, means  
112 (standard deviations), and medians (interquartile range), where appropriate. Comparisons of  
113 categorical variables were done by chi-squared test and of continuous variables by ANOVA test.  
114 Non-normally distributed variables such as length of stay were compared using the Kruskal-  
115 Wallis test. The prevalence of each symptom was calculated by a proportion of exhibiting  
116 patients compared with the whole group.

117 Multivariable logistic regression models were used to identify independent association of  
118 symptoms for in-hospital mortality in older adults. Covariates of interest include age, sex, CFS,  
119 and total comorbidity count (based on documented past medical history). In the multivariable  
120 models, missing data were handled by listwise deletion. Statistical significance was defined at  $p$   
121  $\leq 0.05$ . The analysis was done using R version 4.0.3.

122 Bubble plots were used to demonstrate the prevalence of typical and atypical symptoms  
123 in individuals grouped by age, frailty, place of residence and comorbidity. For this analysis, we  
124 combined classic and typical symptoms into a single “typical symptoms” category so that we  
125 could plot the findings on two axes. The sample size of each plotted group was reflected in the  
126 circle size. Bubble plots were generated by Microsoft Excel.

The association of typical and atypical symptoms on in-hospital mortality of older adults with COVID-19: a multicentre cohort study

## 127 **Reporting standard**

128           The Strengthening the Reporting of Observational Studies in Epidemiology (STROBE)  
129 Statement was used to write this manuscript (Von Elm *et al.*, 2007).

## 130 **Results**

### 131 **Baseline characteristics**

132           A total of 1786 patients (Table 1) were included; their median age was 78.0 years  
133 (interquartile range [IQR] 71.0–85.0) and 847 (47.5%) were female. Overall, most patients were  
134 admitted from the community (n=1247, 70.0%) or LTC (n=258, 14.5%). The mean preadmission  
135 CFS score was 4.73 (standard deviation [SD] 1.65). The median number of comorbidities per  
136 patient was 2.0 (IQR 1.0–4.0).

### 137 **Clinical presentation**

138           At least one of the classic symptoms (Table 1) of fever (n=832, 46.6%), cough (n=929,  
139 52.0%) or dyspnea (n=857, 48.0%) occurred in 1412 patients (79.1%). One or more typical  
140 symptoms occurred in 1263 patients (70.7%). The most common typical symptoms were  
141 malaise/fatigue (n=665, 37.2%), diarrhea (n=291, 16.3%) and chills (n=201, 11.3%). Atypical  
142 symptoms as defined by geriatric syndromes occurred in 1187 (66.5%) patients. The most  
143 common geriatric syndromes were anorexia (n=598, 33.5%), weakness (n=519, 23.9%), and  
144 delirium (n=449, 25.1%). Falls (n=265, 14.8%), functional decline (n=142, 8.0%) and urinary  
145 incontinence (n=141, 7.9%) were less common presentations of COVID-19. Functional decline  
146 as atypical presentation indicates a decline in functional status due to COVID-19 infection and  
147 not a baseline reduction in functional status. Atypical symptoms often occurred in the presence  
148 of classic (n=993, 83.7%) or typical symptoms (n=886, 74.6%). Approximately half of the



The association of typical and atypical symptoms on in-hospital mortality of older adults with COVID-19: a multicentre cohort study

149 cohort (n=738, 43.3%) presented with all 3 classes of symptoms (Figure 1). Atypical symptoms  
150 in isolation were uncommon (n=106, 6.2%).

### 151 **Clinical presentation by pandemic wave**

152 Hospitalized patients were younger (median age 75 years in wave 3 vs. 78.5 in wave 1,  
153  $p<0.001$ ) and less frail (mean CFS 4.09 in wave 3 vs. 5.21 in wave 1,  $p<0.001$ ) in the later  
154 pandemic waves (Table 2). The prevalence of individual symptoms varied through the waves.  
155 For classic and typical symptoms, the prevalence of cough, abdominal pain, rhinorrhea, and  
156 tachycardia decreased through the waves, while the prevalence of dyspnea, chest pain, and  
157 dizziness increased. For atypical symptoms, the prevalence of anorexia, delirium, functional  
158 decline and incontinence decreased through the waves, but the prevalence of weakness increased.

### 159 **Clinical presentation and mortality**

160 In-hospital death occurred in 418 patients (23.4%). Based on univariate analysis, patients  
161 who died (Table 1) were older (median age 82.0 years vs. 76.0,  $p<0.001$ ), more likely to reside  
162 in LTC (21.2% vs. 12.5%,  $p<0.001$ ), and more frail (CFS mean 5.28 vs. 4.56,  $p<0.001$ ). In  
163 univariate analysis, the presence of any classic (odds ratio [OR] 1.42, 95% confidence interval  
164 [CI] 1.07–1.90) or atypical symptoms (OR 1.28, 95% CI 1.01–1.63) was associated with in-  
165 hospital mortality. After adjusting for age, sex, CFS, and comorbidities (Table 3), only the  
166 presence of any classic symptoms was independently associated with in-hospital mortality  
167 (adjusted OR [aOR] 1.71, 95% CI 1.07–1.24).

168 For individual symptoms, the presence of dyspnea (aOR 2.05, 95% CI 1.62–2.62),  
169 tachycardia (aOR 1.87, 95% CI 1.14–3.04), and delirium (aOR 1.52, 95% CI 1.18–1.96) were  
170 independently associated with in-hospital mortality after adjusting for the same variables. The

The association of typical and atypical symptoms on in-hospital mortality of older adults with COVID-19: a multicentre cohort study

171 presence of nausea (aOR 0.50, 95% CI 0.29–0.82) and chills (aOR 0.64, 95% CI 0.40–0.97) was  
172 independently associated with lower mortality.

### 173 **Association of typical and atypical symptoms by age, frailty, place of residence and** 174 **comorbidities**

175 We combined classic and typical symptoms into a single category for this analysis, in  
176 order to plot it against atypical symptoms on a two-axis bubble plot. When grouped by age  
177 (Figure 2), those who were younger than 80 years had slightly more typical symptoms (45.6% vs.  
178 42.8% in those aged  $\geq 80$  years), but the prevalence of atypical symptoms were similar. Frailty  
179 had a larger impact on atypical symptoms (Figure 2). Frail individuals (CFS  $>4$ ) had more  
180 atypical symptoms compared to those who were not frail (61.1% vs. 38.9%). Looking at the  
181 place of residence in older adults prior to hospitalization (Figure 3), those from the community  
182 had fewer atypical symptoms (64.6% in community vs. 78.2% in LTC) compared to those from  
183 LTC. When analysed by individual comorbidity (Figure 4), those with a history of dementia and  
184 falls exhibited relatively more atypical symptoms (79.6% for both dementia and falls vs. 65.9%  
185 for other comorbidities) compared with other comorbidities. Those with a history of chronic  
186 obstructive pulmonary disease (COPD) had relatively more typical symptoms (91.2%) than  
187 atypical symptoms (56.6%). The comorbidities of hypertension, diabetes, cancer, chronic kidney  
188 disease and coronary artery disease clustered closely on the bubble plot, indicating a similar  
189 profile of typical and atypical symptoms.

## 190 **Discussion**

191 In this cohort study of consecutive older adults admitted to hospital and LTC with  
192 COVID-19, we found that atypical presentations were common, but most patients presented with

The association of typical and atypical symptoms on in-hospital mortality of older adults with COVID-19: a multicentre cohort study

193 an overlap of atypical, typical and classic symptoms. Given the inconsistency in defining  
194 atypical symptoms in the literature (Davis *et al.*, 2020; Pritchard *et al.*, 2020), we used three  
195 groups of symptoms to better describe the relationship between symptom types. The overlap in  
196 symptoms indicated that the presentation of COVID-19 in older adults was diverse. As such, a  
197 low threshold for testing is essential to detecting cases.

198 Fever (64–70%), dyspnea (71–73%) and cough (67–96%) were common symptoms in  
199 older adults (aged  $\geq 65$ ) admitted to hospital with community acquired pneumonia or influenza in  
200 pre-COVID studies (Riquelme *et al.*, 1997; Walsh, Cox and Falsey, 2002). Comparatively, the  
201 prevalence of these symptoms in our cohort was lower (46.6–52.0%), suggesting that older  
202 adults with COVID-19 did not present as classically as respiratory infections of the past. A meta-  
203 analysis of COVID-19 studies in older adults from December 2019 to May 2020 revealed a  
204 weighted prevalence of 83% for fever, 60% for cough, and 42% for dyspnea. Increased virulence  
205 of the beta (B.1.351) and gamma (P.1) strains (Health Ontario, 2021), which predominated in the  
206 later waves in 2021, may have contributed to the higher proportion of dyspnea in our cohort  
207 (48.0%). Another explanation for higher dyspnea prevalence was the selection of sicker patients  
208 to be transferred from LTC to hospital given resource limitations at the time (CBC News, 2021)  
209 and from the community given increased recognition of symptoms requiring hospital treatment.

210 We defined atypical presentation as geriatric syndromes aligned with the clinical  
211 literature. Geriatric syndromes are phenotypes that arise from the interaction of frailty, multiple  
212 shared risk factors (e.g. cognitive impairment, gait instability, polypharmacy etc.) and the acute  
213 disease process (Inouye *et al.*, 2007). They may not have a single direct pathophysiologic link to  
214 COVID-19, but rather the combination of infectious process on a susceptible older adult.  
215 Anorexia (44%) and delirium (44%) were the most common atypical symptoms in older adults

The association of typical and atypical symptoms on in-hospital mortality of older adults with COVID-19: a multicentre cohort study

216 hospitalized for community-acquired pneumonia in a study from Barcelona, Spain (Riquelme *et*  
217 *al.*, 1997). In a cohort from Korea (Jung *et al.*, 2017), weakness (27.3%) and delirium (25.4%)  
218 were most common in older adults hospitalized with pneumonia. These findings mirror the most  
219 common atypical symptoms in our cohort. Studies of atypical presentations in older adults with  
220 COVID-19 mostly report on delirium (Pranata *et al.*, no date) and falls (Gawronska and  
221 Lorkowski, 2021), with fewer studies looking at anorexia, weakness and other geriatric  
222 syndromes. One problem is the lack of consensus definition on which geriatric syndromes are  
223 most important to capture (Inouye *et al.*, 2007). Despite early concerns of isolated atypical  
224 presentations in older adults (Solanki, 2020), our study found few patients who presented with a  
225 geriatric syndrome alone without other symptoms (6.2%). The advocacy around atypical  
226 presentations raised awareness for case detection in this population, which helped improve  
227 protocols for LTC locally. Our findings highlighted the importance of understanding geriatric  
228 syndromes as part of disease presentations.

229       Using multivariable models, we determined that dyspnea, tachycardia and delirium were  
230 independently associated with in-hospital mortality. Systematic review of pooled univariate  
231 analyses found similar associations with mortality for dyspnea (Shi *et al.*, 2021), tachycardia (Shi  
232 *et al.*, 2021) and delirium (Pranata *et al.*, no date). Dyspnea and tachycardia are likely reflective  
233 of hypoxia, which is an important independent predictor for disease severity and mortality in  
234 COVID-19 (Gallo Marin *et al.*, 2021). Delirium is an independent predictor of mortality across  
235 medical and surgical patients in studies prior to COVID-19 (Aung Thein *et al.*, 2020). These  
236 symptoms, including delirium, can help clinicians decide which patients to send to hospital in  
237 repeated waves of the pandemic. LTC outbreaks are occurring again in Ontario as a result of the  
238 omicron variant (McKenzie-Sutter, 2021) and clinicians can use these symptoms along with

The association of typical and atypical symptoms on in-hospital mortality of older adults with COVID-19: a multicentre cohort study

239 oxygen saturation to determine which patients need medications or acute care treatment.  
240 Conversely, the presence of nausea, chills, and myalgias were independently associated with  
241 decreased in-hospital mortality. Previous studies have not found these associations (McKenzie-  
242 Sutter, 2021), but most studies were done when the wild type version of the virus was circulating.  
243 It is possible that certain variants trigger differing symptoms (Health Ontario, 2021). Nausea,  
244 chills, and myalgias are also not related to respiratory status or hemodynamic instability, perhaps  
245 reflecting milder disease.

246 We further analysed clinical presentation by place of residence and comorbidities. The  
247 proportion of atypical symptoms were higher for those from LTC and those who had falls or  
248 dementia on history. These populations were likely more frail, which predisposes them to  
249 geriatric syndromes (Inouye *et al.*, 2007). Patients from the community and those with common  
250 comorbidities like hypertension, diabetes, and coronary artery disease had relatively more typical  
251 symptoms as they were likely less frail. This finding suggests that in frail individuals with pre-  
252 existing geriatric syndromes attention should be given to atypical presentations and management  
253 should include prevention of geriatric complications (e.g. delirium, falls, medication adverse  
254 effects). Our analysis by frailty status and age confirmed that frailty was a relatively greater  
255 contributor to atypical presentations compared with age (Figure 2). Another finding from the  
256 bubble plot was that older patients with COPD often present with typical symptoms such as  
257 dyspnea or cough. Patients with COPD have upregulation of the angiotensin-converting enzyme  
258 2 (ACE-2) receptor in their airway epithelial cells, which is the primary target for spike protein  
259 attachment during a SARS-CoV-2 infection (Higham *et al.*, 2020). This allows for deeper and  
260 more severe infections in patients with COPD, which may result in predominantly respiratory  
261 symptoms, even early in the disease course (Higham *et al.*, 2020). The varying clinical

The association of typical and atypical symptoms on in-hospital mortality of older adults with COVID-19: a multicentre cohort study

262 presentations with different comorbidities should be explored in future studies to further aid  
263 detection and mechanistic understanding of the disease.

264 This study was limited by its retrospective design, which did not allow for prospective  
265 delirium assessment or collection of symptoms. Agreement was not assessed for the chart  
266 abstraction process, but each chart assessor was trained and supervised by a physician  
267 investigator through the study. Frailty data were based on the documented pre-admission  
268 baseline functional status, and data were missing for some patients because a functional inquiry  
269 was not always included in clinical notes. We imputed the CFS for patients admitted from  
270 retirement home and LTC in a conservative way, which may underestimate true frailty. The CFS  
271 data were also imputed at the chart abstraction stage. SARS-CoV-2 variant data was not  
272 available at all sites, so we did not report it in this study, which limited our ability to analyse  
273 symptoms by variant.

274 Strengths of this study included the use of a three-category classification of symptoms  
275 that allowed determination of the contribution of geriatric syndromes. Compared to other studies  
276 we included more geriatric-focused symptoms, such as incontinence, falls, and functional decline.  
277 We also included consecutively admitted older adults to eight hospitals and had a consistent  
278 chart review process at all sites, guided by a physician at each site. Delirium was abstracted  
279 using a validated chart review method (Saczynski *et al.*, 2014).

## 280 **Conclusion**

281 Atypical presentations of COVID-19 in isolation are uncommon in older adults who were  
282 hospitalized. Of all symptoms, dyspnea, tachycardia and delirium were independently associated  
283 with mortality. Symptoms also varied by risk factors of individual patients, particularly by frailty

The association of typical and atypical symptoms on in-hospital mortality of older adults with COVID-19: a multicentre cohort study

284 status. Future research should be directed at understanding how COVID-19 interacts with  
285 different comorbid diseases and patient characteristics.

## 286 **Acknowledgements**

287 We thank Dr. Camilla Wong for providing training for chart abstraction; Dr. Samir Sinha and Dr.  
288 Rajin Mehta for assistance with funding and site project support.

## 290 **Authors and contributors**

291 Conceptualisation, data curation, investigation, formal analysis, visualisation, validation,  
292 writing – original draft, and writing – review & editing: All authors (EKCW, JW, HZ, AC, AWZ,  
293 JB, AV, AB, RN, KP, TI, SES, BL).

294  
295 Funding acquisition, methodology, project administration, resources – EKCW, JW, AV, AB, TI,  
296 RN, KP, SES, BL

297  
298 Supervision – SES and BL

299  
300 Underlying data was verified by EKCW, JW, RN, KP, TI, SES and BL. All authors confirm that  
301 they had full access to all the data in the study and accept responsibility to submit for publication.

## 303 **Declaration of interests**

304 The authors have no conflicts to declare.

## 306 **Funding**

307 Academic Health Science Centre Alternate Funding Plans (AFP) Innovative Funds from Unity  
308 Health Toronto and Baycrest Health Sciences; Sinai Health/University Health Network Healthy  
309 Ageing and Geriatrics Program and its Geriatrics Summer Scholars Program; Division of  
310 Geriatric Medicine and General Internal Medicine, Sunnybrook Health Sciences Centre. The  
311 sponsor has no role in this study's design, method, subject recruitment, data collection, analysis  
312 and manuscript. SES is funded by a Tier 1 Canada Research Chair. EKW is funded by the  
313 Clinician Scientist Training Program at the University of Toronto and the Vanier Scholarship  
314 from the Canadian Institutes of Health Research.

## 316 **Research in context**

### 317 *Evidence before this study*

318 Systematic reviews have demonstrated the prevalence of typical and atypical symptoms of  
319 COVID-19 in older adults. Atypical symptoms can have various definitions in the literature,  
320 including geriatric syndromes and other symptoms such as nausea, headache, and myalgia.  
321 Certain symptoms were known to be associated with a higher risk of mortality.

### 323 *Added value of this study*

324 Our study uses a cohort of consecutively admitted older adults with COVID-19 in seven  
325 hospitals to determine the prevalence of atypical presentations as defined by geriatric syndromes.  
326 We separated the geriatric syndromes from other symptoms and showed that the occurrence of  
327 these symptoms in isolation was uncommon. We further analysed the evolution of symptom

The association of typical and atypical symptoms on in-hospital mortality of older adults with COVID-19: a multicentre cohort study

328 prevalence over three waves of the pandemic. We also determined that frailty was a bigger  
329 contributor to atypical symptoms compared with older age. Specific comorbidities also  
330 predisposed to a higher risk of atypical symptoms.

331

332 *Implications of all the available evidence*

333 Awareness of the underlying patient characteristics can help guide clinicians in assessing for  
334 COVID-19 risk. Future studies should be done to determine the impact of comorbidities and  
335 frailty on disease presentations.

336

337 **Data sharing**

338 Deidentified study data is available upon request.

339



The association of typical and atypical symptoms on in-hospital mortality of older adults with COVID-19: a multicentre cohort study

## 340 **References**

- 341 Aung Thein, M. Z. *et al.* (2020) 'A call to action for delirium research: Meta-analysis and  
342 regression of delirium associated mortality.', *BMC geriatrics*, 20(1), p. 325. doi:  
343 10.1186/s12877-020-01723-4.
- 344 CBC News (2021) *Ontario faces third wave of COVID-19 pandemic if variants aren't controlled,*  
345 *modelling warns / CBC News, CBC News.* Available at:  
346 <https://www.cbc.ca/news/canada/toronto/ontario-covid-modelling-update-1.5910777> (Accessed:  
347 18 October 2021).
- 348 City of Toronto (2021) *COVID-19: Case Counts, City of Toronto.* City of Toronto. Available at:  
349 [https://www.toronto.ca/home/covid-19/covid-19-latest-city-of-toronto-news/covid-19-pandemic-](https://www.toronto.ca/home/covid-19/covid-19-latest-city-of-toronto-news/covid-19-pandemic-data/covid-19-weekday-status-of-cases-data/)  
350 [data/covid-19-weekday-status-of-cases-data/](https://www.toronto.ca/home/covid-19/covid-19-latest-city-of-toronto-news/covid-19-pandemic-data/covid-19-weekday-status-of-cases-data/) (Accessed: 22 June 2021).
- 351 Davis, P. *et al.* (2020) 'Atypical presentations in the hospitalised older adult testing positive for  
352 SARS-CoV-2: a retrospective observational study in Glasgow, Scotland', *Scottish Medical*  
353 *Journal.* SAGE Publications Ltd. doi: 10.1177/0036933020962891.
- 354 Von Elm, E. *et al.* (2007) 'The Strengthening the Reporting of Observational Studies in  
355 Epidemiology (STROBE) statement: Guidelines for reporting observational studies', *Annals of*  
356 *Internal Medicine.* American College of Physicians, pp. 573–577. doi: 10.7326/0003-4819-147-  
357 8-200710160-00010.
- 358 Emmett, K. R. (1998) 'Nonspecific and atypical presentation of disease in the older patient',  
359 *Geriatrics*, pp. 50–60.
- 360 Fisman, D. N. and Tuite, A. R. (2021) 'Evaluation of the relative virulence of novel SARS-CoV-  
361 2 variants: a retrospective cohort study in Ontario, Canada.', *CMAJ* = *Canadian Medical*  
362 *Association journal = journal de l'Association medicale canadienne*, 193(42), pp. E1619–E1625.  
363 doi: 10.1503/cmaj.211248.
- 364 Gallo Marin, B. *et al.* (2021) 'Predictors of COVID-19 severity: A literature review.', *Reviews in*  
365 *medical virology*, 31(1), pp. 1–10. doi: 10.1002/rmv.2146.
- 366 Gan, J. M. *et al.* (2020) 'Atypical presentation of COVID-19 in hospitalised older adults', *Irish*  
367 *Journal of Medical Science.* Springer Science and Business Media Deutschland GmbH. doi:  
368 10.1007/s11845-020-02372-7.
- 369 Gawronska, K. and Lorkowski, J. (2021) 'Falls as One of the Atypical Presentations of COVID-  
370 19 in Older Population.', *Geriatric orthopaedic surgery & rehabilitation*, 12, p.  
371 2151459321996619. doi: 10.1177/2151459321996619.
- 372 Guan, W. *et al.* (2020) 'Clinical Characteristics of Coronavirus Disease 2019 in China', *New*  
373 *England Journal of Medicine.* Massachusetts Medical Society, 382(18). Available at:  
374 [https://www-nejm-org.myaccess.library.utoronto.ca/doi/full/10.1056/NEJMoa2002032](https://www.nejm-org.myaccess.library.utoronto.ca/doi/full/10.1056/NEJMoa2002032)  
375 (Accessed: 3 April 2020).
- 376 Health Ontario, P. (2021) 'Comparing SARS-CoV-2 Variants of Concern (VOCs)\* as of May 31,  
377 2021'. doi: 10.1093/cid/ciab186.
- 378 Higham, A. *et al.* (2020) 'COVID-19 and COPD: a narrative review of the basic science and  
379 clinical outcomes.', *European respiratory review* = *an official journal of the European*  
380 *Respiratory Society*, 29(158). doi: 10.1183/16000617.0199-2020.
- 381 Hofman, M. R. *et al.* (2017) 'Elderly patients with an atypical presentation of illness in the  
382 emergency department', *Netherlands Journal of Medicine.* Van Zuiden Communications BV,  
383 75(6), pp. 241–246.
- 384 Inouye, S. K. *et al.* (2007) 'Geriatric syndromes: clinical, research, and policy implications of a

The association of typical and atypical symptoms on in-hospital mortality of older adults with COVID-19: a multicentre cohort study

- 385 core geriatric concept.’, *Journal of the American Geriatrics Society*, 55(5), pp. 780–91. doi:  
386 10.1111/j.1532-5415.2007.01156.x.
- 387 Jung, Y. J. *et al.* (2017) ‘Atypical Clinical Presentation of Geriatric Syndrome in Elderly Patients  
388 With Pneumonia or Coronary Artery Disease’, *Annals of Geriatric Medicine and Research*,  
389 21(4), pp. 158–163. doi: 10.4235/agmr.2017.21.4.158.
- 390 Kelly, S. *et al.* (2017) ‘Prevalence of frailty among community dwelling older adults in receipt of  
391 low level home support: a cross-sectional analysis of the North Dublin Cohort’, *BMC Geriatrics*.  
392 BioMed Central Ltd., 17(1), p. 121. doi: 10.1186/s12877-017-0508-2.
- 393 McKenzie-Sutter, H. (2021) *Ontario halts visits, social trips for long-term care residents amid*  
394 *Omicron spread | CBC News, CBC News*. Available at:  
395 <https://www.cbc.ca/news/canada/toronto/long-term-care-homes-new-rules-omicron-1.6299230>  
396 (Accessed: 29 December 2021).
- 397 Muscedere, J. *et al.* (2016) ‘Screening for Frailty in Canada’s Health Care System: A Time for  
398 Action’, *Canadian Journal on Aging*. Cambridge University Press, 35(3), pp. 281–297. doi:  
399 10.1017/S0714980816000301.
- 400 Pranata, R. *et al.* (no date) ‘Delirium and Mortality in Coronavirus Disease 2019 (COVID-19) -  
401 A Systematic Review and Meta-analysis.’, *Archives of gerontology and geriatrics*, 95, p. 104388.  
402 doi: 10.1016/j.archger.2021.104388.
- 403 Pritchard, M. G. *et al.* (2020) ‘Symptoms at presentation for patients admitted to hospital with  
404 Covid-19: results from the ISARIC prospective multinational observational study’, *medRxiv*.  
405 medRxiv. doi: 10.1101/2020.10.26.20219519.
- 406 Riquelme, R. *et al.* (1997) ‘Community-acquired pneumonia in the elderly. Clinical and  
407 nutritional aspects.’, *American journal of respiratory and critical care medicine*, 156(6), pp.  
408 1908–14. doi: 10.1164/ajrccm.156.6.9702005.
- 409 Rockwood, K. *et al.* (2005) ‘A global clinical measure of fitness and frailty in elderly people.’,  
410 *CMAJ* □: *Canadian Medical Association journal = journal de l’Association medicale*  
411 *canadienne*, 173(5), pp. 489–95. doi: 10.1503/cmaj.050051.
- 412 Saczynski, J. S. *et al.* (2014) ‘A tale of two methods: chart and interview methods for identifying  
413 delirium.’, *Journal of the American Geriatrics Society*, 62(3), pp. 518–24. doi:  
414 10.1111/jgs.12684.
- 415 Shi, C. *et al.* (2021) ‘Predictors of mortality in patients with coronavirus disease 2019: a  
416 systematic review and meta-analysis.’, *BMC infectious diseases*, 21(1), p. 663. doi:  
417 10.1186/s12879-021-06369-0.
- 418 Singhal, S. *et al.* (2021) ‘Clinical features and outcomes of COVID-19 in older adults: a  
419 systematic review and meta-analysis.’, *BMC geriatrics*, 21(1), p. 321. doi: 10.1186/s12877-021-  
420 02261-3.
- 421 Solanki, T. (2020) *Atypical Covid-19 presentations in older people – the need for continued*  
422 *vigilance, British Geriatrics Society Blog*. Available at: [https://www.bgs.org.uk/blog/atypical-](https://www.bgs.org.uk/blog/atypical-covid-19-presentations-in-older-people—the-need-for-continued-vigilance)  
423 [covid-19-presentations-in-older-people—the-need-for-continued-vigilance](https://www.bgs.org.uk/blog/atypical-covid-19-presentations-in-older-people—the-need-for-continued-vigilance) (Accessed: 30 March  
424 2021).
- 425 Walsh, E. E., Cox, C. and Falsey, A. R. (2002) ‘Clinical features of influenza A virus infection in  
426 older hospitalized persons.’, *Journal of the American Geriatrics Society*, 50(9), pp. 1498–503.  
427 doi: 10.1046/j.1532-5415.2002.50404.x.
- 428 World Health Organization (2020) *WHO COVID-19 Case definition, World Health Organization*.  
429 Available at: [https://www.who.int/publications/i/item/WHO-2019-nCoV-](https://www.who.int/publications/i/item/WHO-2019-nCoV-Surveillance_Case_Definition-2020.2)  
430 [Surveillance\\_Case\\_Definition-2020.2](https://www.who.int/publications/i/item/WHO-2019-nCoV-Surveillance_Case_Definition-2020.2) (Accessed: 16 February 2021).

The association of typical and atypical symptoms on in-hospital mortality of older adults with COVID-19: a multicentre cohort study

431 ZOE COVID Study (2021) *Omicron and cold-like symptoms rapidly taking over in London*, ZOE  
432 *COVID Study*. Available at: [https://covid.joinzoe.com/post/omicron-and-cold-like-symptoms-](https://covid.joinzoe.com/post/omicron-and-cold-like-symptoms-rapidly-taking-over-in-london)  
433 [rapidly-taking-over-in-london](https://covid.joinzoe.com/post/omicron-and-cold-like-symptoms-rapidly-taking-over-in-london) (Accessed: 29 December 2021).  
434  
435  
436  
437

The association of typical and atypical symptoms on in-hospital mortality of older adults with COVID-19: a multicentre cohort study

438 **Table 1: Prevalence of individual symptoms of COVID-19 presentation in hospitalized older adults stratified**  
 439 **by in-hospital mortality.** Place of residence indicates location of patient prior to admission.

| Symptom                               | Missing, n (%) | Cohort, n (%)    | Death, n (%)     | No death, n (%)  | p-value |
|---------------------------------------|----------------|------------------|------------------|------------------|---------|
| n                                     |                | 1786 (100)       | 418 (23.4)       | 1359 (76.1)      |         |
| Baseline characteristics              |                |                  |                  |                  |         |
| Age, median (IQR)                     | 0              | 78.0 (71.0–85.0) | 82.0 (74.0–89.0) | 76.0 (70.0–84.0) | <0.001  |
| Female sex*, n (%)                    | 0              | 847 (47.5)       | 181 (43.3)       | 663 (48.8)       | 0.055   |
| Clinical frailty scale, mean (SD)     | 61 (3.4)       | 4.73 (1.65)      | 5.28 (1.68)      | 4.56 (1.60)      | <0.001  |
| Number of comorbidities, median (IQR) | 0              | 2.0 (1.0–4.0)    | 3.0 (2.0–4.0)    | 2.0 (1.0–4.0)    | <0.001  |
| Place of residence                    | 5 (0.3)        |                  |                  |                  | <0.001  |
| Community                             |                | 1247 (70.0)      | 241 (58.1)       | 997 (73.5)       |         |
| LTC                                   |                | 258 (14.5)       | 88 (21.2)        | 170 (12.5)       |         |
| Hospital                              |                | 100 (5.6)        | 28 (6.7)         | 72 (5.3)         |         |
| Retirement home                       |                | 96 (5.4)         | 34 (8.2)         | 62 (4.6)         |         |
| Rehab                                 |                | 47 (2.6)         | 17 (4.1)         | 30 (2.2)         |         |
| Shelter                               |                | 22 (1.2)         | 2 (0.5)          | 20 (1.5)         |         |
| Other institution                     |                | 10 (0.6)         | 5 (1.2)          | 5 (0.4)          |         |
| Symptom classification                |                |                  |                  |                  |         |
| Any classic symptoms, n (%)           | 0              | 1412 (79.1)      | 348 (83.3)       | 1057 (77.8)      | 0.019   |
| Any typical symptoms, n (%)           | 0              | 1263 (70.7)      | 291 (69.6)       | 965 (71.0)       | 0.628   |
| Any atypical symptoms, n (%)          | 0              | 1187 (66.5)      | 295 (70.6)       | 885 (65.1)       | 0.045   |
| Classic symptoms                      |                |                  |                  |                  |         |
| Cough                                 | 0              | 929 (52.0)       | 211 (50.5)       | 712 (52.4)       | 0.530   |
| Fever (>37.8°C)                       | 0              | 832 (46.6)       | 202 (48.3)       | 626 (46.1)       | 0.450   |
| Dyspnea                               | 0              | 857 (48.0)       | 238 (56.9)       | 617 (45.4)       | <0.001  |
| Typical symptoms                      |                |                  |                  |                  |         |
| Malaise/fatigue                       | 0              | 665 (37.2)       | 155 (37.1)       | 504 (37.1)       | 1       |
| Diarrhea                              | 0              | 291 (16.3)       | 60 (14.4)        | 229 (16.9)       | 0.257   |
| Chills                                | 0              | 201 (11.3)       | 30 (7.2)         | 171 (12.6)       | 0.003   |
| Myalgia                               | 0              | 189 (10.6)       | 25 (6.0)         | 161 (11.8)       | 0.001   |
| Nausea                                | 0              | 154 (8.6)        | 19 (4.5)         | 133 (9.8)        | 0.001   |
| Sputum                                | 0              | 140 (7.8)        | 34 (8.1)         | 106 (7.8)        | 0.906   |
| Vomiting                              | 0              | 127 (7.1)        | 24 (5.7)         | 102 (7.5)        | 0.263   |
| Abdominal pain                        | 0              | 95 (5.3)         | 19 (4.5)         | 76 (5.6)         | 0.479   |
| Headache                              | 0              | 110 (6.2)        | 21 (5.0)         | 88 (6.5)         | 0.335   |
| Rhinorrhea                            | 0              | 124 (6.9)        | 30 (7.2)         | 94 (6.9)         | 0.942   |
| Tachycardia (>90/min)                 | 0              | 82 (4.6)         | 34 (8.1)         | 48 (3.5)         | <0.001  |
| Sore throat                           | 0              | 113 (6.3)        | 23 (5.5)         | 88 (6.5)         | 0.546   |
| Chest pain                            | 0              | 92 (5.2)         | 17 (4.1)         | 75 (5.5)         | 0.296   |
| Dizziness                             | 0              | 95 (5.3)         | 16 (3.8)         | 78 (5.7)         | 0.161   |
| Conjunctivitis                        | 0              | 12 (0.7)         | 3 (0.7)          | 9 (0.7)          | 1       |
| Atypical symptoms                     |                |                  |                  |                  |         |
| Anorexia                              | 0              | 598 (33.5)       | 137 (32.8)       | 457 (33.6)       | 0.792   |
| Weakness                              | 0              | 519 (29.1)       | 128 (30.6)       | 388 (28.6)       | 0.451   |
| Delirium                              | 0              | 449 (25.1)       | 153 (36.6)       | 295 (21.7)       | <0.001  |
| Falls                                 | 0              | 265 (14.8)       | 67 (16.0)        | 197 (14.5)       | 0.489   |
| Functional decline                    | 0              | 142 (8.0)        | 42 (10.0)        | 100 (7.4)        | 0.095   |
| Incontinence                          | 0              | 141 (7.9)        | 31 (7.4)         | 110 (8.1)        | 0.73    |
| Weight loss                           | 0              | 24 (1.3)         | 8 (1.9)          | 16 (1.2)         | 0.369   |
| Other                                 | 0              | 2 (0.1)          | 0 (0.0)          | 2 (0.1)          | 1       |

\*As collected on chart. IQR = interquartile range; SD = standard deviation

440  
441

The association of typical and atypical symptoms on in-hospital mortality of older adults with COVID-19: a multicentre cohort study

442 **Table 2: Prevalence of individual symptoms of wave of the pandemic.**  
443

| Symptom                               | Wave 1, n (%)    | Wave 2, n (%)    | Wave 3, n (%)    | p-value |
|---------------------------------------|------------------|------------------|------------------|---------|
| n                                     | 316 (17.7)       | 845 (47.3)       | 625 (35.0)       |         |
| Baseline characteristics              |                  |                  |                  |         |
| Age, median (IQR)                     | 78.5 (71.5–86.0) | 79.0 (72.0–87.0) | 75.0 (69.0–82.0) | <0.001  |
| Female sex*, n (%)                    | 138 (43.7)       | 409 (48.5)       | 300 (48.0)       | 0.328   |
| Clinical frailty scale, mean (SD)     | 5.21 (1.65)      | 5.01 (1.63)      | 4.09 (1.48)      | <0.001  |
| Number of comorbidities, median (IQR) | 3.0 (2.0–4.0)    | 3.0 (2.0–4.0)    | 2.0 (1.0–3.0)    | 0.358   |
| Symptom classification                |                  |                  |                  |         |
| Any classic symptoms, n (%)           | 253 (80.1)       | 649 (76.8)       | 510 (81.6)       | 0.073   |
| Any typical symptoms, n (%)           | 220 (69.6)       | 600 (71.0)       | 443 (70.9)       | 0.893   |
| Any atypical symptoms, n (%)          | 217 (68.7)       | 588 (69.6)       | 382 (61.1)       | 0.002   |
| Classic symptoms                      |                  |                  |                  |         |
| Cough                                 | 184 (58.2)       | 424 (50.2)       | 321 (51.4)       | 0.046   |
| Fever (>37.8°C)                       | 152 (48.1)       | 375 (44.4)       | 305 (48.8)       | 0.204   |
| Dyspnea                               | 152 (48.1)       | 378 (44.7)       | 327 (52.3)       | 0.016   |
| Typical symptoms                      |                  |                  |                  |         |
| Malaise/fatigue                       | 112 (35.4)       | 329 (38.9)       | 224 (35.8)       | 0.368   |
| Diarrhea                              | 58 (18.4)        | 126 (14.9)       | 107 (17.1)       | 0.289   |
| Chills                                | 40 (12.7)        | 91 (10.8)        | 70 (11.2)        | 0.662   |
| Myalgia                               | 34 (10.8)        | 80 (9.5)         | 75 (12.0)        | 0.294   |
| Nausea                                | 36 (11.4)        | 70 (8.3)         | 48 (7.7)         | 0.142   |
| Sputum                                | 29 (9.2)         | 64 (7.6)         | 47 (7.5)         | 0.621   |
| Vomiting                              | 29 (9.2)         | 52 (6.2)         | 46 (7.4)         | 0.195   |
| Abdominal pain                        | 25 (7.9)         | 46 (5.4)         | 24 (3.8)         | 0.031   |
| Headache                              | 23 (7.3)         | 58 (6.9)         | 29 (4.6)         | 0.142   |
| Rhinorrhea                            | 30 (9.5)         | 76 (9.0)         | 18 (2.9)         | <0.001  |
| Tachycardia (>90/min)                 | 17 (5.4)         | 47 (5.6)         | 18 (2.9)         | 0.04    |
| Sore throat                           | 19 (6.0)         | 59 (7.0)         | 35 (5.6)         | 0.543   |
| Chest pain                            | 14 (4.4)         | 34 (4.0)         | 44 (7.0)         | 0.029   |
| Dizziness                             | 7 (2.2)          | 55 (6.5)         | 33 (5.3)         | 0.015   |
| Conjunctivitis                        | 3 (0.9)          | 6 (0.7)          | 3 (0.5)          | 0.695   |
| Atypical symptoms                     |                  |                  |                  |         |
| Anorexia                              | 128 (40.5)       | 292 (34.6)       | 178 (28.5)       | 0.001   |
| Weakness                              | 74 (23.4)        | 242 (28.6)       | 203 (32.5)       | 0.014   |
| Delirium                              | 103 (32.6)       | 239 (28.3)       | 107 (17.1)       | <0.001  |
| Falls                                 | 40 (12.7)        | 129 (15.3)       | 96 (15.4)        | 0.485   |
| Functional decline                    | 34 (10.8)        | 74 (8.8)         | 34 (5.4)         | 0.008   |
| Incontinence                          | 22 (7.0)         | 99 (11.7)        | 20 (3.2)         | <0.001  |
| Weight loss                           | 5 (1.6)          | 13 (1.5)         | 6 (1.0)          | 0.585   |
| Other                                 | 2 (0.6)          | 0 (0.0)          | 0 (0.0)          | 0.009   |

\*As collected on chart. IQR = interquartile range; SD = standard deviation

444  
445

The association of typical and atypical symptoms on in-hospital mortality of older adults with COVID-19: a multicentre cohort study

446 **Table 3: Unadjusted and adjusted odds ratios (OR) for symptoms that were significantly correlated with in-**  
447 **hospital mortality in the univariate analysis.** Symptoms were adjusted for age (each 5 year increase), sex, clinical  
448 frailty scale, and total number of comorbidities using a multivariable model for each symptom.  
449

| Symptom              | Unadjusted OR (95% CI) | Adjusted OR (95% CI) | p-value |
|----------------------|------------------------|----------------------|---------|
| Individual symptoms  |                        |                      |         |
| Dyspnea              | 1.59 (1.28–1.99)       | 2.05 (1.62–2.62)     | <0.001  |
| Nausea               | 0.44 (0.26–0.70)       | 0.50 (0.29–0.82)     | 0.009   |
| Myalgia              | 0.47 (0.30–0.72)       | 0.65 (0.40–1.02)     | 0.070   |
| Chills               | 0.54 (0.35–0.79)       | 0.64 (0.40–0.97)     | 0.042   |
| Tachycardia          | 2.42 (1.53–3.79)       | 1.87 (1.14–3.04)     | 0.011   |
| Delirium             | 2.08 (1.64–2.64)       | 1.52 (1.18–1.96)     | 0.001   |
| Symptom group        |                        |                      |         |
| Any classic symptom  | 1.42 (1.07–1.90)       | 1.71 (1.07–1.24)     | <0.001  |
| Any atypical symptom | 1.28 (1.01–1.63)       | 1.02 (0.79–1.33)     | 0.860   |

95% CI = 95% confidence intervals

450  
451  
452  
453

The association of typical and atypical symptoms on in-hospital mortality of older adults with COVID-19: a multicentre cohort study

454 **Figure 1: Distribution of patients presenting with classic, typical and atypical symptoms shown in a Venn**  
455 **diagram.**

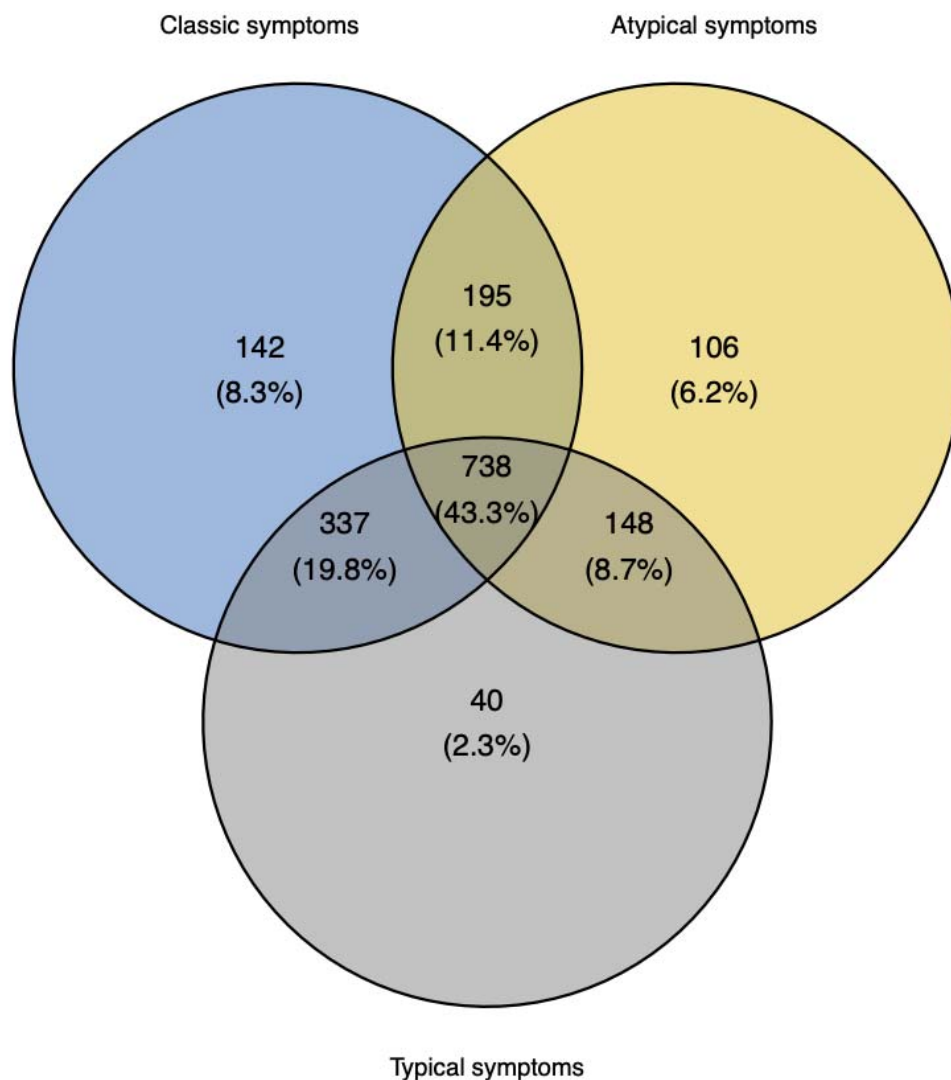

456  
457 Classic symptoms were defined by at least one of cough, fever or dyspnea. Typical symptoms included other  
458 symptoms such as rhinorrhea, chills, myalgias, diarrhea, etc. Atypical symptoms included geriatric syndromes such  
459 as delirium, falls, weakness, etc.  
460  
461  
462  
463



The association of typical and atypical symptoms on in-hospital mortality of older adults with COVID-19: a multicentre cohort study

464 **Figure 2: Bubble plot of proportion of atypical and typical symptoms by age group (<80**  
465 **and ≥80 years) and frailty (clinical frailty scale ≤4 and >4 [frail]).** The size of each circle  
466 corresponds to the sample size of each place of residence. Classic and typical symptoms were  
467 combined into a single category for this analysis. Atypical symptoms are defined by geriatric  
468 syndromes in our study (e.g. anorexia, delirium, weakness). Typical symptoms are non-geriatric  
469 syndromes (e.g. cough, dyspnea, fever).  
470

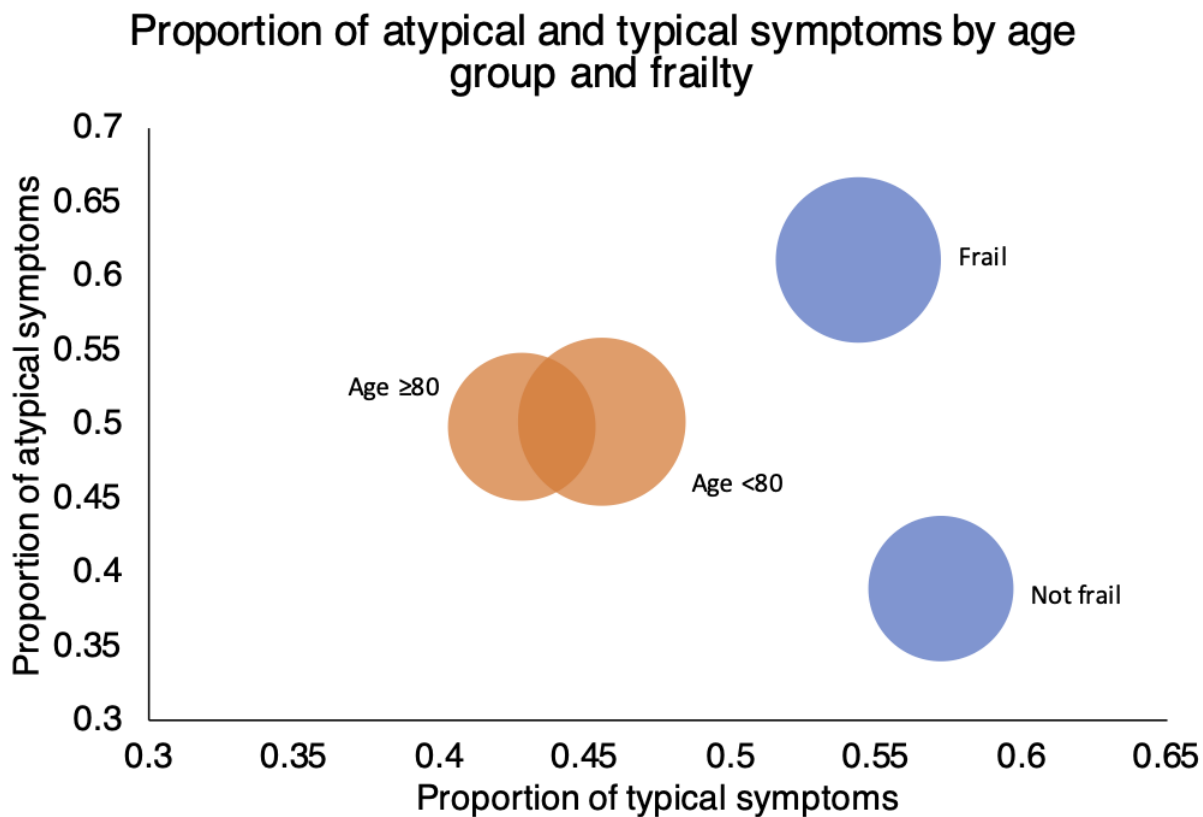

471  
472  
473  
474



The association of typical and atypical symptoms on in-hospital mortality of older adults with COVID-19: a multicentre cohort study

475 **Figure 3: Bubble plot of the proportion of atypical and typical symptoms by place of**  
476 **residence (preadmission location) in older adults admitted to hospital with COVID-19.** The  
477 size of each circle corresponds to the sample size of each place of residence. Classic and typical  
478 symptoms were combined into a single category for this analysis. Atypical symptoms are defined  
479 by geriatric syndromes in our study (e.g. anorexia, delirium, weakness). Typical symptoms are  
480 non-geriatric syndromes (e.g. cough, dyspnea, fever). LTC = long-term care.  
481

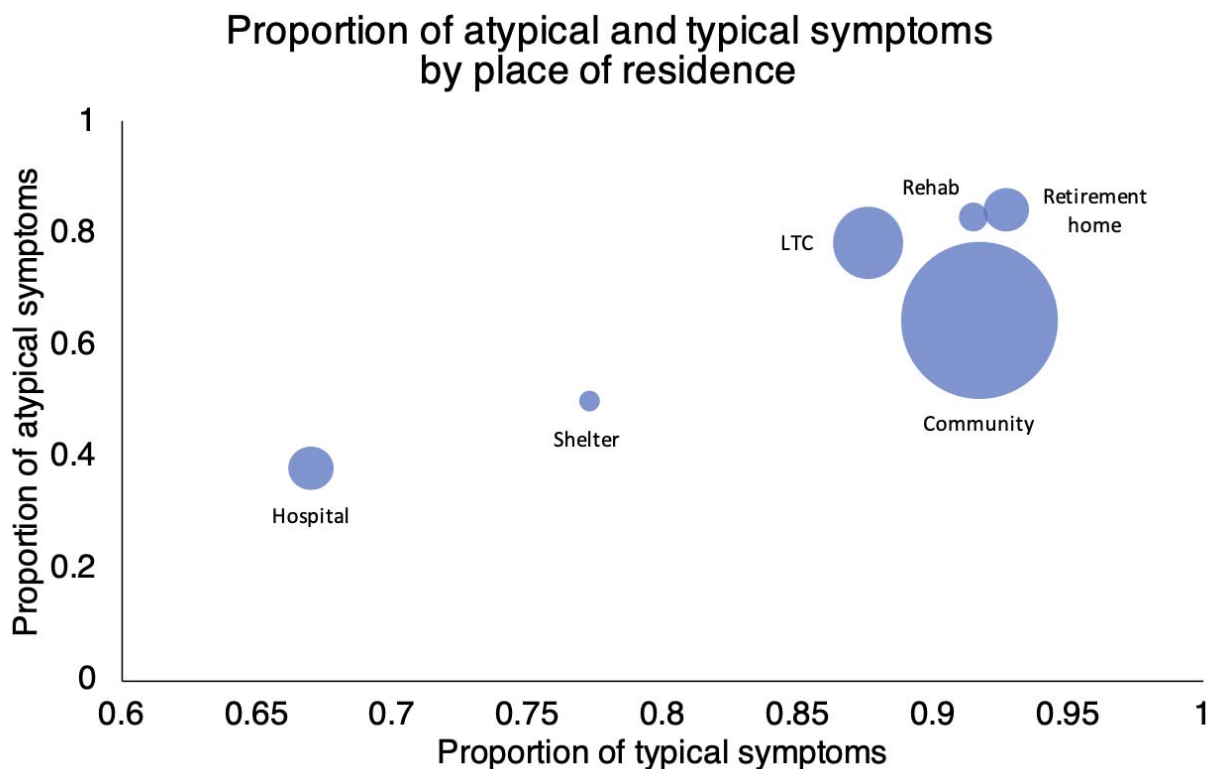

482  
483  
484  
485

The association of typical and atypical symptoms on in-hospital mortality of older adults with COVID-19: a multicentre cohort study

486 **Figure 4: Bubble plot of atypical and typical symptoms by comorbidities. The size of each**  
487 **circle corresponds to the sample size of each place of residence.** Classic and typical  
488 symptoms were combined into a single category for this analysis. Atypical symptoms are defined  
489 by geriatric syndromes in our study (e.g. anorexia, delirium, weakness). Typical symptoms are  
490 non-geriatric syndromes (e.g. cough, dyspnea, fever). CKD = chronic kidney disease; CAD =  
491 coronary artery disease; COPD = chronic pulmonary obstructive disease.  
492

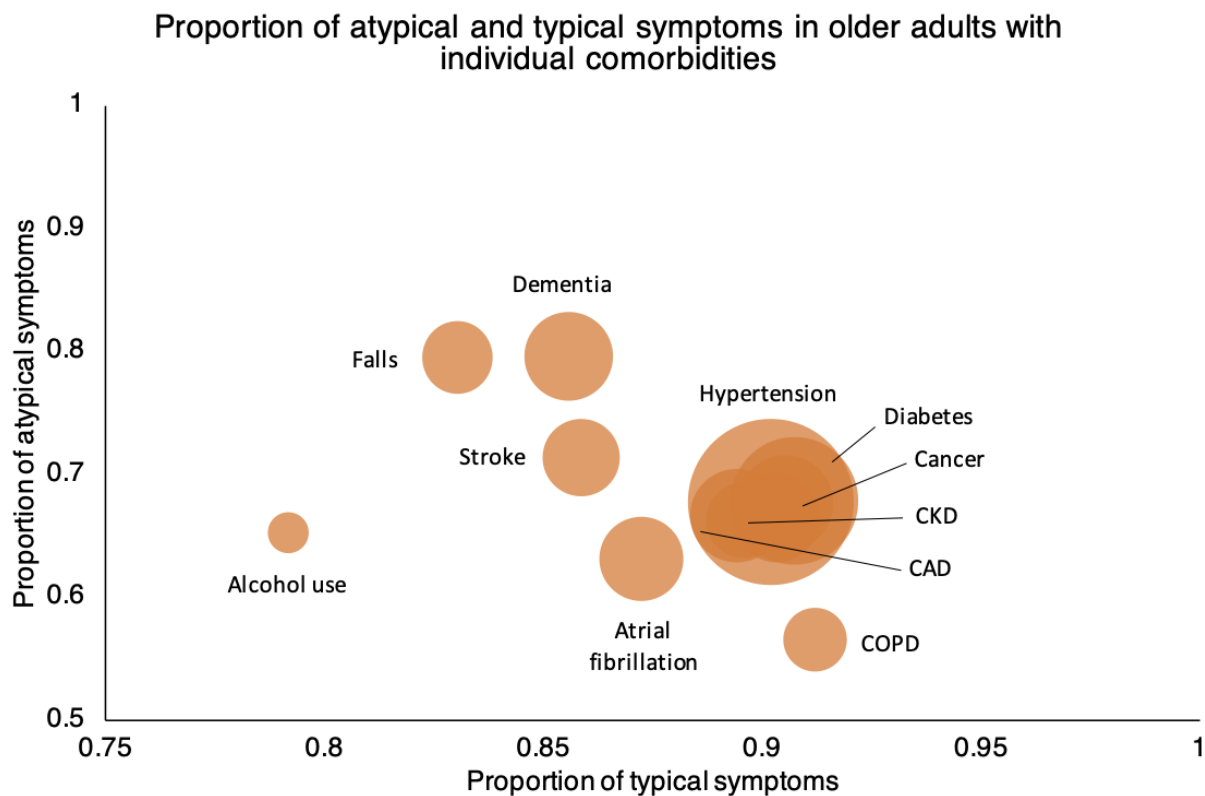

493
